# Supplementary material for: An Orthologics Study of the Notch Signalling Pathway
Source: Preprints.org preprint supplement (doi:10.20944/preprints202410.0411.v1), 2024-10-07
Supplement: Supplementary file 1 [file supplementary]

## Sheet: Original
Name on WP268	Equivalent HGNC	E value*	Original PSn	Steps	Uniprot	ortho in				Curated PSn
ADAM17		6e-178	4	1.08333	P78536	Branchiostomatidae				9
APH1A		1e-34	2	1.23077	Q96BI3	Cnidaria				6
APH1B		2e-125			Q8WW43	Elasmobranchi sharks and rays				12
CIR	CIR1	1e-63			Q86X95	Porifera				5
CREBBP		0			Q92793	Porifera				5
CTBP1		0			Q13363	Bilateria				7
CTBP2		0			P56545	Branchiostomatidae				9
DLL1		2e-110	1	3.84615	O00548	Cnidaria				6
DLL3		1e-111	15.2	4.77692	Q9NYJ7	Elasmobranchi sharks and rays				12
DLL4		3e-180	12	5	Q9NR61	Branchiostomatidae				9
DTX1		5e-100	12	5	Q86Y01	Bilateria				7
DTX2		6e-83	7	2.46154	Q86UW9	Porifera				5
DTX3		8e-63	2	4.07692	Q8N9I9	Porifera				5
DTX3L		9e-59			Q8TDB6	Elasmobranchi sharks and rays				12
DTX4		2e-87	12	4.38462	Q9Y2E6	Cnidaria				6
DVL1		0			O14640	Elasmobranchi sharks and rays				12
DVL2		0			O14641	Elasmobranchi sharks and rays				12
DVL3		0			Q92997	Cyclostomata				11
GCN5L2	KAT2A	0			Q92830	Porifera				5
HDAC1		0			Q13547	Fungi				3
HDAC2		0			Q92769	Protista				2
HES1		6e-50	6	2.30769	Q14469	Cnidaria				6
HES5		5e-43			Q5TA89	Elasmobranchi sharks and rays				12
JAG1		0	7	1.92308	P78504	Cnidaria				6
JAG2		0			Q9Y219	Elasmobranchi sharks and rays				12
LFNG		8e-51	7	2.23077	Q8NES3	Porifera				5
MAML1		0	12	2.5	Q92585	Elasmobranchi sharks and rays				12
MAML3		0	7	1.69231	Q96JK9	Elasmobranchi sharks and rays				12
MFNG		3e-91			O00587	Cnidaria				6
NCOR2		2.2e-117	2	3	Q9Y618	Cnidaria				6
NCSTN		1e-106	1	0.692308	Q92542	Porifera				5
NOTCH1		0	7	2.92308	P46531	Cnidaria				6
NOTCH2		0	1	4.69231	Q04721	Branchiostomatidae				9
NOTCH3		0	4	4.07692	Q9UM47	Elasmobranchi sharks and rays				12
NOTCH4		0	1	3.45714	Q99466	Amphibia				13
NUMB		2e-47	6	2.69231	P49757	Porifera flags				5
NUMBL		4e-111			Q9Y6R0	Bilateria				7
PCAF	KAT2B	0			Q92831	Cnidaria				6
PSEN1		2e-162	1	1.23077	P49768	Cnidaria				6
PSEN2		0	1	0.769231	P49810	Elasmobranchi sharks and rays				12
PTCRA		1e-34			Q6ISU1	Amniota				14
RBPJ		9e-53	3	0.769231	Q06330	Fungus				3
RBPSUHL	RBPJL	2e-150			Q9UBG7	Porifera				5
RFNG		7e-88			Q9Y644	Cnidaria				6
SKIP	SNW1	2e-170	3		Q13573	Fungus
TNF		5e-34			P01375	Elasmobranchi sharks and rays				12

## Sheet: working sheet
HGNC (or name on WP268)	Uniprot	ortho in	PSn	E value*	Comments from GeneCards
ADAM17	P78536	Branchiostomatidae	9	6e-178	Acts as an activator of Notch pathway by mediating cleavage of Notch, generating the membrane-associated intermediate fragment
APH1A	Q96BI3	Cnidaria	6	1e-34	Functional component of the gamma-secretase complex, which also contains presenilin and nicastrin and catalyzes the cleavage of integral proteins such as notch receptors
APH1B	Q8WW43	Elasmobranchi sharks and rays	12	2e-125	As above
CIR1 (CIR)	Q86X95	Porifera	5	1e-63	Regulates transcription and acts as corepressor for RBPJ(see below). Recruits RBPJ to the Sin3-histone deacetylase complex (HDAC, see below). Required for RBPJ-mediated repression of transcription.
CREBBP	Q92793	Porifera	5	0	Known to play critical roles in embryonic development, growth control, and homeostasis by coupling chromatin remodeling to transcription factor recognition.
CTBP1	Q13363	Bilateria	7	0	A transcriptional repressor. This protein and the product of a second closely related gene, CTBP2, can dimerize. Both proteins participate in regulation of gene expression during development.
CTBP2	P56545	Branchiostomatidae	9	0	See above
DLL1	O00548	Cnidaria	6	2e-110	Present on Cell 1, binds the extracellular domainof Notch receptors on Cell 2, and triggers Notch signaling through induction of cleavage, hyperphosphorylation, and nuclear accumulation of the intracellular domain of Notch receptors.
DLL3	Q9NYJ7	Elasmobranchi sharks and rays	12	1e-111	As above
DLL4	Q9NR61	Branchiostomatidae	9	3e-180	As above
DTX1	Q86Y01	Bilateria	7	5e-100	acts as a positive regulator of Notch, but it also acts as a negative regulator, depending on the developmental and cell context. Mediates the antineural activity of Notch.
DTX2	Q86UW9	Porifera	5	6e-83	As above
DTX3	Q8N9I9	Porifera	5	8e-63	As above
DTX3L	Q8TDB6	Elasmobranchi sharks and rays	12	9e-59	in NOTCH pathway
DTX4	Q9Y2E6	Cnidaria	6	2e-87	acts as a positive regulator of Notch, but it also acts as a negative regulator, depending on the developmental and cell context. Mediates the antineural activity of Notch.
DVL1	O14640	Elasmobranchi sharks and rays	12	0	Participates in Wnt signaling by binding to the cytoplasmic C-terminus of frizzled family members (see FRGs below) and transducing the Wnt signal to down-stream effectors.
DVL2	O14641	Elasmobranchi sharks and rays	12	0	Participates in Wnt signaling by binding to the cytoplasmic C-terminus of frizzled family members (see FRGs below) and transducing the Wnt signal to down-stream effectors.
DVL3	Q92997	Cyclostomata	11	0	Participates in Wnt signaling by binding to the cytoplasmic C-terminus of frizzled family members (see FRGs below) and transducing the Wnt signal to down-stream effectors.
KAT2A (GCN5L2)	Q92830	Porifera	5	0	Among its pathways are Constitutive Signaling by NOTCH1
HDAC1	Q13547	Fungi	3	0	Histone deacetylase that catalyzes the deacetylation of lysine residues on the N-terminal part of the core histones (H2A, H2B, H3 and H4), giving a tag for epigenetic repression and playing an important role in transcriptional regulation, cell cycle progression and developmental events
HDAC2	Q92769	Protista	2	0	As above
HES1	Q14469	Cnidaria	6	6e-50	Transcriptional repressor of genes that require these bHLH (Basic Helix Loop Helix) proteins for their transcription. Terminal member of NOTCH pathway.
HES5	Q5TA89	Elasmobranchi sharks and rays	12	5e-43	Transcriptional repressor of genes that require these bHLH (Basic Helix Loop Helix) proteins for their transcription. Terminal member of NOTCH pathway.
JAG1	P78504	Cnidaria	6	0	Human jagged 1 is the ligand situated on Cell1 for the receptor NOTCH 1, situated on Cell2, and thus initiates the NOTCH signaling processes.
JAG2	Q9Y219	Elasmobranchi sharks and rays	12	0	As above - one of several ligands that activate Notch and related receptors.
LFNG	Q8NES3	Porifera	5	8e-51	Modulates NOTCH1 activity by nhibition of NOTCH1 activation by JAG1 and enhancement of NOTCH1 activation by DLL1.
MAML1	Q92585	Elasmobranchi sharks and rays	12	0	A transcriptional coactivator for NOTCH proteins, amplifies NOTCH-induced transcription of HES1.
MAML3	Q96JK9	Elasmobranchi sharks and rays	12	0	As above.
MFNG	O00587	Cnidaria	6	3e-91	As LFNG. Modulates NOTCH1 activity by nhibition of NOTCH1 activation by JAG1 and enhancement of NOTCH1 activation by DLL1.
NCOR2	Q9Y618	Cnidaria	6	2.2e-117	Acts as part of a multisubunit complex - a corepressor complex - which includes histone deacetylases (see above) to modify chromatin structure that prevents basal transcriptional activity of target genes.
NCSTN	Q92542	Porifera	5	1e-106	Essential subunit of the gamma-secretase complex that (it includes APH1A, APH1B, PSEN1, and PSEN2) that catalyzes the intramembrane cleavage of integral membrane proteins such as Notch receptors
NOTCH1	P46531	Cnidaria	6	0	On Cell2, functions as a receptor for Cell1's membrane-bound ligands Jagged-1 (JAG1), Jagged-2 (JAG2) and Delta-1 (DLL1) to regulate cell-fate determination.
NOTCH2	Q04721	Porifera	6	0	As above
NOTCH3	Q9UM47	Elasmobranchi sharks and rays	12	0	As above
NOTCH4	Q99466	Amphibia	13	0	As above
NUMB	P49757	Porifera flags	5	2e-47	Regulates clathrin-mediated receptor endocytosis of the NOTCH integral membrane proteins
NUMBL	Q9Y6R0	Bilateria	7	4e-111	As above. Regulates clathrin-mediated receptor endocytosis of the NOTCH integral membrane proteins
KAT2B (PCAF)	Q92831	Cnidaria	6	0	Functions as a histone acetyltransferase (HAT) to promote transcriptional activation
PSEN1	P49768	Cnidaria	6	2e-162	See NCSTN above.
PSEN2	P49810	Elasmobranchi sharks and rays	12	0	See NCSTN above.
PTCRA	Q6ISU1	Amniota	14	1e-34	Dimerization-dependent target of NOTCH
RBPJ	Q06330	Fungus	3	9e-53	Mainly nuclear. Transcriptional activator of Notch target genes.
RBPJL (RBPSUHL)	Q9UBG7	Porifera	5	2e-150	As above
SNW1 (SKIP)	Q13573	Fungus	3	2e-170
RFNG	Q9Y644	Cnidaria	6	7e-88	Modulates NOTCH1 activity by enhancement of activation by DLL1 and JAG1.
TNF	P01375	Elasmobranchi sharks and rays	12	5e-34	Induces thetranslocation of intracellular domain of Notch protein into the nucleus

## Sheet: Just HGNC
ADAM17			ADGRL3
APH1A			AES
APH1B			AKAP2
CIR1			ASXL3
CREBBP			CALD1
CTBP1			CBLN1
CTBP2			CDH1
DLL1			CDH2
DLL3			CDH7
DLL4			CDH8
DTX1			CDH11
DTX2			CDH16
DTX3			CDH18
DTX3L			CLDN1
DTX4			CLDN18
DVL1			CLDN19
DVL2			CLDND1
DVL3			COL22A1
KAT2A			COL23A1
HDAC1			CRYGN
HDAC2			CRYGS
HES1			DLX2
HES5			DLX3
JAG1			EFNA1
JAG2			EFNA2
LFNG			EFNA3
MAML1			EFNA4
MAML3			EFNA5
MFNG			FAM3D
NCOR2			FBXO24
NCSTN			FGF12
NOTCH1			FGF5
NOTCH2			FLRT2
NOTCH3			FLRT3
NOTCH4			FZD3
NUMB			FZD6
NUMBL			GJA4
KAT2B			GJA5
PSEN1			GJA8
PSEN2			GJB1
PTCRA			GJB2
RBPJ			GJB6
RBPJL			GJC1
RFNG			GNRH1
TNF			H1FOO
			HSPB1
			IRX5
			MAGED1
			MAGED2
			MAGED3
			MAGED4
			MIA
			MYADML2
			MYBPC1
			MYBPC2
			MYBPC3
			MYH1
			MYH13
			MYH15
			MYH4
			MYH8
			MYL4
			MYL5
			MYL7
			MYOM1
			NECTIN1
			NECTIN3
			PALLD
			PITX3
			PCDH12
			PCDHGB7
			RGS18
			SERPINA4
			STXBP6
			SYNPO2
			TFAP2B
			TFAP2E
			TMEM150B
			TMPRSS11A
			TMPRSS12
			TNNT1
			ZBED5
			ZIC3
			ZMAT1

## Sheet: as Table S1
SUPPLEMENTARY TABLE S1 ANNOTATIONS FROM GENECARDS* OF NOTCH SIGNALLING PROTEINS
HGNC (or name on WP268)	Annotations from GeneCards
ADAM17	Acts as an activator of Notch pathway by mediating cleavage of Notch, generating the membrane-associated intermediate fragment
APH1A	Functional component of the gamma-secretase complex, which also contains presenilin and nicastrin and catalyzes the cleavage of integral proteins such as notch receptors
APH1B	As above
CIR1 (CIR)	Regulates transcription and acts as corepressor for RBPJ(see below). Recruits RBPJ to the Sin3-histone deacetylase complex (HDAC, see below). Required for RBPJ-mediated repression of transcription.
CREBBP	Known to play critical roles in embryonic development, growth control, and homeostasis by coupling chromatin remodeling to transcription factor recognition.
CTBP1	A transcriptional repressor. This protein and the product of a second closely related gene, CTBP2, can dimerize. Both proteins participate in regulation of gene expression during development.
CTBP2	See above
DLL1	Present on Cell 1, binds the extracellular domainof Notch receptors on Cell 2, and triggers Notch signaling through induction of cleavage, hyperphosphorylation, and nuclear accumulation of the intracellular domain of Notch receptors.
DLL3	As above
DLL4	As above
DTX1	acts as a positive regulator of Notch, but it also acts as a negative regulator, depending on the developmental and cell context. Mediates the antineural activity of Notch.
DTX2	As above
DTX3	As above
DTX3L	in NOTCH pathway
DTX4	acts as a positive regulator of Notch, but it also acts as a negative regulator, depending on the developmental and cell context. Mediates the antineural activity of Notch.
DVL1	Participates in Wnt signaling by binding to the cytoplasmic C-terminus of frizzled family members (see FRGs below) and transducing the Wnt signal to down-stream effectors.
DVL2	Participates in Wnt signaling by binding to the cytoplasmic C-terminus of frizzled family members (see FRGs below) and transducing the Wnt signal to down-stream effectors.
DVL3	Participates in Wnt signaling by binding to the cytoplasmic C-terminus of frizzled family members (see FRGs below) and transducing the Wnt signal to down-stream effectors.
KAT2A (GCN5L2)	Among its pathways are Constitutive Signaling by NOTCH1
HDAC1	Histone deacetylase that catalyzes the deacetylation of lysine residues on the N-terminal part of the core histones (H2A, H2B, H3 and H4), giving a tag for epigenetic repression and playing an important role in transcriptional regulation, cell cycle progression and developmental events
HDAC2	As above
HES1	Transcriptional repressor of genes that require these bHLH (Basic Helix Loop Helix) proteins for their transcription. Terminal member of NOTCH pathway.
HES5	Transcriptional repressor of genes that require these bHLH (Basic Helix Loop Helix) proteins for their transcription. Terminal member of NOTCH pathway.
JAG1	Human jagged 1 is the ligand situated on Cell1 for the receptor NOTCH 1, situated on Cell2, and thus initiates the NOTCH signaling processes.
JAG2	As above - one of several ligands that activate Notch and related receptors.
LFNG	Modulates NOTCH1 activity by nhibition of NOTCH1 activation by JAG1 and enhancement of NOTCH1 activation by DLL1.
MAML1	A transcriptional coactivator for NOTCH proteins, amplifies NOTCH-induced transcription of HES1.
MAML3	As above.
MFNG	As LFNG. Modulates NOTCH1 activity by nhibition of NOTCH1 activation by JAG1 and enhancement of NOTCH1 activation by DLL1.
NCOR2	Acts as part of a multisubunit complex - a corepressor complex - which includes histone deacetylases (see above) to modify chromatin structure that prevents basal transcriptional activity of target genes.
NCSTN	Essential subunit of the gamma-secretase complex that (it includes APH1A, APH1B, PSEN1, and PSEN2) that catalyzes the intramembrane cleavage of integral membrane proteins such as Notch receptors
NOTCH1	On Cell2, functions as a receptor for Cell1's membrane-bound ligands Jagged-1 (JAG1), Jagged-2 (JAG2) and Delta-1 (DLL1) to regulate cell-fate determination.
NOTCH2	As above
NOTCH2NLA	Human-specific protein that promotes neural progenitor proliferation and evolutionary expansion of the brain neocortex by regulating the Notch signaling pathway
NOTCH2NLB	Human-specific protein that promotes neural progenitor proliferation and evolutionary expansion of the brain neocortex by regulating the Notch signaling pathway
NOTCH2NLC	Human-specific protein that promotes neural progenitor proliferation and evolutionary expansion of the brain neocortex by regulating the Notch signaling pathway
NOTCH3	As NOTCH2 above
NOTCH4	As NOTCH2 above
NUMB	Regulates clathrin-mediated receptor endocytosis of the NOTCH integral membrane proteins
NUMBL	As above. Regulates clathrin-mediated receptor endocytosis of the NOTCH integral membrane proteins
KAT2B (PCAF)	Functions as a histone acetyltransferase (HAT) to promote transcriptional activation
PSEN1	See NCSTN above.
PSEN2	See NCSTN above.
PTCRA	Dimerization-dependent target of NOTCH
RBPJ	Transcriptional activator of Notch target genes.
RBPJL (RBPSUHL)	As above
RFNG	Modulates NOTCH1 activity by enhancement of activation by DLL1 and JAG1.
SNW1 (SKIP)	Iinvolved in NOTCH1-mediated transcriptional activation in pre-mRNA splicing as component of the spliceosome
TNF	Induces thetranslocation of intracellular domain of Notch protein into the nucleus
Footnote * :	tps://www.genecards.org

## Sheet: with histogram calculations
Name on WP268	HGNC	E value*	Original PSn	Steps	Uniprot	ortho in				Curated PSn		Curated PSn		1		0
ADAM17		6e-178	4	1.08333	P78536	Branchiostomatidae				9		2		2	1	1
APH1A		1e-34	2	1.23077	Q96BI3	Cnidaria				6		3		3	2	3
APH1B		2e-125			Q8WW43	Elasmobranchi sharks and rays				12		3		4		3
CIR	CIR1	1e-63			Q86X95	Porifera				5		5		5	9	12
CREBBP		0			Q92793	Porifera				5		5		6	11	23
CTBP1		0			Q13363	Bilateria				7		5		7	3	26
CTBP2		0			P56545	Branchiostomatidae				9		5		8		26
DLL1		2e-110	1	3.84615	O00548	Cnidaria				6		5		9	4	30
DLL3		1e-111	15.2	4.77692	Q9NYJ7	Elasmobranchi sharks and rays				12		5		10		30
DLL4		3e-180	12	5	Q9NR61	Branchiostomatidae				9		5		11	1	31
DTX1		5e-100	12	5	Q86Y01	Bilateria				7		5		12	12	43
DTX2		6e-83	7	2.46154	Q86UW9	Porifera				5		5		13	1	44
DTX3		8e-63	2	4.07692	Q8N9I9	Porifera				5		6		14	1	45
DTX3L		9e-59			Q8TDB6	Elasmobranchi sharks and rays				12		6			45
DTX4		2e-87	12	4.38462	Q9Y2E6	Cnidaria				6		6
DVL1		0			O14640	Elasmobranchi sharks and rays				12		6
DVL2		0			O14641	Elasmobranchi sharks and rays				12		6
DVL3		0			Q92997	Cyclostomata				11		6
GCN5L2	KAT2A	0			Q92830	Porifera				5		6
HDAC1		0			Q13547	Fungi				3		6
HDAC2		0			Q92769	Protista				2		6
HES1		6e-50	6	2.30769	Q14469	Cnidaria				6		6
HES5		5e-43			Q5TA89	Elasmobranchi sharks and rays				12		7
JAG1		0	7	1.92308	P78504	Cnidaria				6		7
JAG2		0			Q9Y219	Elasmobranchi sharks and rays				12		7
LFNG		8e-51	7	2.23077	Q8NES3	Porifera				5		8
MAML1		0	12	2.5	Q92585	Elasmobranchi sharks and rays				12		9
MAML3		0	7	1.69231	Q96JK9	Elasmobranchi sharks and rays				12		9
MFNG		3e-91			O00587	Cnidaria				6		9
NCOR2		2.2e-117	2	3	Q9Y618	Cnidaria				6		9
NCSTN		1e-106	1	0.692308	Q92542	Porifera				5		11
NOTCH1		0	7	2.92308	P46531	Hemichordata				8		12
NOTCH2		0	1	4.69231	Q04721	Branchiostomatidae				9		12
NOTCH3		0	4	4.07692	Q9UM47	Elasmobranchi sharks and rays				12		12
NOTCH4		0	1	3.45714	Q99466	Amphibia				13		12
NUMB		2e-47	6	2.69231	P49757	Porifera flags				5		12
NUMBL		4e-111			Q9Y6R0	Bilateria				7		12
PCAF	KAT2B	0			Q92831	Cnidaria				6		12
PSEN1		2e-162	1	1.23077	P49768	Cnidaria				6		12
PSEN2		0	1	0.769231	P49810	Elasmobranchi sharks and rays				12		12
PTCRA		1e-34			Q6ISU1	Amniota				14		12
RBPJ		9e-53	3	0.769231	Q06330	Fungus				3		12
RBPSUHL	RBPJL	2e-150			Q9UBG7	Porifera				5		12
RFNG		7e-88			Q9Y644	Cnidaria				6		13
TNF		5e-34			P01375	Elasmobranchi sharks and rays				12		14
